# Supplementary material for: Association between Empirical Anti-Pseudomonal Antibiotics and Progression to Thoracic Surgery and Death in Empyema: Database Research
Source: MDPI journal article supplement (doi:10.3390/antibiotics13050383), 2024-04-24
Supplement: s1 [file s1]

**Supplementary Table S1.** The RECORD statement

|                           | Item No. | STROBE items                                                                                                                                                                               | Location in manuscript where items are reported | RECORD items                                                                                                                                                                                                                                                                                                                                                                                                                                       | Location in manuscript where items are reported |
|---------------------------|----------|--------------------------------------------------------------------------------------------------------------------------------------------------------------------------------------------|-------------------------------------------------|----------------------------------------------------------------------------------------------------------------------------------------------------------------------------------------------------------------------------------------------------------------------------------------------------------------------------------------------------------------------------------------------------------------------------------------------------|-------------------------------------------------|
| <b>Title and abstract</b> |          |                                                                                                                                                                                            |                                                 |                                                                                                                                                                                                                                                                                                                                                                                                                                                    |                                                 |
|                           | 1        | (a) Indicate the study's design with a commonly used term in the title or the abstract (b) Provide in the abstract an informative and balanced summary of what was done and what was found | 1                                               | <p>RECORD 1.1: The type of data used should be specified in the title or abstract. When possible, the name of the databases used should be included.</p> <p>RECORD 1.2: If applicable, the geographic region and timeframe within which the study took place should be reported in the title or abstract.</p> <p>RECORD 1.3: If linkage between databases was conducted for the study, this should be clearly stated in the title or abstract.</p> | 1                                               |
| <b>Introduction</b>       |          |                                                                                                                                                                                            |                                                 |                                                                                                                                                                                                                                                                                                                                                                                                                                                    |                                                 |
| Background rationale      | 2        | Explain the scientific background and rationale for the investigation being reported                                                                                                       | 2                                               |                                                                                                                                                                                                                                                                                                                                                                                                                                                    |                                                 |
| Objectives                | 3        | State specific objectives, including any prespecified hypotheses                                                                                                                           | 2                                               |                                                                                                                                                                                                                                                                                                                                                                                                                                                    |                                                 |

| Methods      |   |                                                                                                                                                                                                                                                                                                                                                                                                                                                                                                                                                                                                           |     |                                                                                                                                                                                                                                                                                                                                                                                                                                                                                                                                                                                                                                                                                                      |   |
|--------------|---|-----------------------------------------------------------------------------------------------------------------------------------------------------------------------------------------------------------------------------------------------------------------------------------------------------------------------------------------------------------------------------------------------------------------------------------------------------------------------------------------------------------------------------------------------------------------------------------------------------------|-----|------------------------------------------------------------------------------------------------------------------------------------------------------------------------------------------------------------------------------------------------------------------------------------------------------------------------------------------------------------------------------------------------------------------------------------------------------------------------------------------------------------------------------------------------------------------------------------------------------------------------------------------------------------------------------------------------------|---|
| Study Design | 4 | Present key elements of study design early in the paper                                                                                                                                                                                                                                                                                                                                                                                                                                                                                                                                                   |     |                                                                                                                                                                                                                                                                                                                                                                                                                                                                                                                                                                                                                                                                                                      |   |
| Setting      | 5 | Describe the setting, locations, and relevant dates, including periods of recruitment, exposure, follow-up, and data collection                                                                                                                                                                                                                                                                                                                                                                                                                                                                           | 7-8 |                                                                                                                                                                                                                                                                                                                                                                                                                                                                                                                                                                                                                                                                                                      |   |
| Participants | 6 | <p><i>(a) Cohort study</i> - Give the eligibility criteria, and the sources and methods of selection of participants. Describe methods of follow-up</p> <p><i>Case-control study</i> - Give the eligibility criteria, and the sources and methods of case ascertainment and control selection. Give the rationale for the choice of cases and controls</p> <p><i>Cross-sectional study</i> - Give the eligibility criteria, and the sources and methods of selection of participants</p> <p><i>(b) Cohort study</i> - For matched studies, give matching criteria and number of exposed and unexposed</p> | 8   | <p>RECORD 6.1: The methods of study population selection (such as codes or algorithms used to identify subjects) should be listed in detail. If this is not possible, an explanation should be provided.</p> <p>RECORD 6.2: Any validation studies of the codes or algorithms used to select the population should be referenced. If validation was conducted for this study and not published elsewhere, detailed methods and results should be provided.</p> <p>RECORD 6.3: If the study involved linkage of databases, consider use of a flow diagram or other graphical display to demonstrate the data linkage process, including the number of individuals with linked data at each stage.</p> | 8 |

|                              |    |                                                                                                                                                                                             |     |                                                                                                                                                                                                                 |   |
|------------------------------|----|---------------------------------------------------------------------------------------------------------------------------------------------------------------------------------------------|-----|-----------------------------------------------------------------------------------------------------------------------------------------------------------------------------------------------------------------|---|
|                              |    | <i>Case-control study</i> - For matched studies, give matching criteria and the number of controls per case                                                                                 |     |                                                                                                                                                                                                                 |   |
| Variables                    | 7  | Clearly define all outcomes, exposures, predictors, potential confounders, and effect modifiers. Give diagnostic criteria, if applicable.                                                   | 8   | RECORD 7.1: A complete list of codes and algorithms used to classify exposures, outcomes, confounders, and effect modifiers should be provided. If these cannot be reported, an explanation should be provided. | 8 |
| Data sources/<br>measurement | 8  | For each variable of interest, give sources of data and details of methods of assessment (measurement).<br><br>Describe comparability of assessment methods if there is more than one group | 8   |                                                                                                                                                                                                                 |   |
| Bias                         | 9  | Describe any efforts to address potential sources of bias                                                                                                                                   | 8-9 |                                                                                                                                                                                                                 |   |
| Study size                   | 10 | Explain how the study size was arrived at                                                                                                                                                   | 8   |                                                                                                                                                                                                                 |   |
| Quantitative variables       | 11 | Explain how quantitative variables were handled in the analyses. If applicable, describe which groupings were chosen, and why                                                               | 8-9 |                                                                                                                                                                                                                 |   |
| Statistical methods          | 12 | (a) Describe all statistical methods, including those used to control for confounding                                                                                                       | 9   |                                                                                                                                                                                                                 |   |

|                                  |  |                                                                                                                                                                                                                                                                                                                                                                                                                                                                                                        |  |                                                                                                                                                                                                                                                                     |                |
|----------------------------------|--|--------------------------------------------------------------------------------------------------------------------------------------------------------------------------------------------------------------------------------------------------------------------------------------------------------------------------------------------------------------------------------------------------------------------------------------------------------------------------------------------------------|--|---------------------------------------------------------------------------------------------------------------------------------------------------------------------------------------------------------------------------------------------------------------------|----------------|
|                                  |  | <p>(b) Describe any methods used to examine subgroups and interactions</p> <p>(c) Explain how missing data were addressed</p> <p>(d) <i>Cohort study</i> - If applicable, explain how loss to follow-up was addressed</p> <p><i>Case-control study</i> - If applicable, explain how matching of cases and controls was addressed</p> <p><i>Cross-sectional study</i> - If applicable, describe analytical methods taking account of sampling strategy</p> <p>(e) Describe any sensitivity analyses</p> |  |                                                                                                                                                                                                                                                                     |                |
| Data access and cleaning methods |  | ..                                                                                                                                                                                                                                                                                                                                                                                                                                                                                                     |  | <p>RECORD 12.1: Authors should describe the extent to which the investigators had access to the database population used to create the study population.</p> <p>RECORD 12.2: Authors should provide information on the data cleaning methods used in the study.</p> | 11             |
| Linkage                          |  | ..                                                                                                                                                                                                                                                                                                                                                                                                                                                                                                     |  | RECORD 12.3: State whether the study included person-level, institutional-level, or other data linkage across two or more databases. The methods of linkage and                                                                                                     | Not applicable |

|                  |    |                                                                                                                                                                                                                                                                                                                                                            |     |                                                                                                                                                                                                                                                                                                                    |   |
|------------------|----|------------------------------------------------------------------------------------------------------------------------------------------------------------------------------------------------------------------------------------------------------------------------------------------------------------------------------------------------------------|-----|--------------------------------------------------------------------------------------------------------------------------------------------------------------------------------------------------------------------------------------------------------------------------------------------------------------------|---|
|                  |    |                                                                                                                                                                                                                                                                                                                                                            |     | methods of linkage quality evaluation should be provided.                                                                                                                                                                                                                                                          |   |
| <b>Results</b>   |    |                                                                                                                                                                                                                                                                                                                                                            |     |                                                                                                                                                                                                                                                                                                                    |   |
| Participants     | 13 | <p>(a) Report the numbers of individuals at each stage of the study (<i>e.g.</i>, numbers potentially eligible, examined for eligibility, confirmed eligible, included in the study, completing follow-up, and analysed)</p> <p>(b) Give reasons for non-participation at each stage.</p> <p>(c) Consider use of a flow diagram</p>                        | 2   | RECORD 13.1: Describe in detail the selection of the persons included in the study ( <i>i.e.</i> , study population selection) including filtering based on data quality, data availability and linkage. The selection of included persons can be described in the text and/or by means of the study flow diagram. | 2 |
| Descriptive data | 14 | <p>(a) Give characteristics of study participants (<i>e.g.</i>, demographic, clinical, social) and information on exposures and potential confounders</p> <p>(b) Indicate the number of participants with missing data for each variable of interest</p> <p>(c) <i>Cohort study</i> - summarise follow-up time (<i>e.g.</i>, average and total amount)</p> | 2-4 |                                                                                                                                                                                                                                                                                                                    |   |
| Outcome data     | 15 | <i>Cohort study</i> - Report numbers of outcome events or summary measures over time                                                                                                                                                                                                                                                                       | 5   |                                                                                                                                                                                                                                                                                                                    |   |

|                   |    |                                                                                                                                                                                                                                                                                                                                                                                                                         |   |                                                                              |   |
|-------------------|----|-------------------------------------------------------------------------------------------------------------------------------------------------------------------------------------------------------------------------------------------------------------------------------------------------------------------------------------------------------------------------------------------------------------------------|---|------------------------------------------------------------------------------|---|
|                   |    | <i>Case-control study</i> - Report numbers in each exposure category, or summary measures of exposure<br><br><i>Cross-sectional study</i> - Report numbers of outcome events or summary measures                                                                                                                                                                                                                        |   |                                                                              |   |
| Main results      | 16 | (a) Give unadjusted estimates and, if applicable, confounder-adjusted estimates and their precision (e.g., 95% confidence interval). Make clear which confounders were adjusted for and why they were included<br><br>(b) Report category boundaries when continuous variables were categorized<br><br>(c) If relevant, consider translating estimates of relative risk into absolute risk for a meaningful time period | 5 |                                                                              |   |
| Other analyses    | 17 | Report other analyses done—e.g., analyses of subgroups and interactions, and sensitivity analyses                                                                                                                                                                                                                                                                                                                       | 6 |                                                                              |   |
| <b>Discussion</b> |    |                                                                                                                                                                                                                                                                                                                                                                                                                         |   |                                                                              |   |
| Key results       | 18 | Summarise key results with reference to study objectives                                                                                                                                                                                                                                                                                                                                                                | 6 |                                                                              |   |
| Limitations       | 19 | Discuss limitations of the study, taking into account sources of                                                                                                                                                                                                                                                                                                                                                        | 7 | RECORD 19.1: Discuss the implications of using data that were not created or | 7 |

|                                                           |    |                                                                                                                                                                            |     |                                                                                                                                                                                                                             |    |
|-----------------------------------------------------------|----|----------------------------------------------------------------------------------------------------------------------------------------------------------------------------|-----|-----------------------------------------------------------------------------------------------------------------------------------------------------------------------------------------------------------------------------|----|
|                                                           |    | potential bias or imprecision. Discuss both direction and magnitude of any potential bias                                                                                  |     | collected to answer the specific research question(s). Include discussion of misclassification bias, unmeasured confounding, missing data, and changing eligibility over time, as they pertain to the study being reported. |    |
| Interpretation                                            | 20 | Give a cautious overall interpretation of results considering objectives, limitations, multiplicity of analyses, results from similar studies, and other relevant evidence | 6-7 |                                                                                                                                                                                                                             |    |
| Generalisability                                          | 21 | Discuss the generalisability (external validity) of the study results                                                                                                      | 6-7 |                                                                                                                                                                                                                             |    |
| <b>Other Information</b>                                  |    |                                                                                                                                                                            |     |                                                                                                                                                                                                                             |    |
| Funding                                                   | 22 | Give the source of funding and the role of the funders for the present study and, if applicable, for the original study on which the present article is based              | 17  |                                                                                                                                                                                                                             |    |
| Accessibility of protocol, raw data, and programming code |    | ..                                                                                                                                                                         |     | RECORD 22.1: Authors should provide information on how to access any supplemental information such as the study protocol, raw data, or programming code.                                                                    | 17 |

**Supplementary Table S2.** Variable definitions

|                          |                                                                                                                                                                                                                                                                                                                                                                                                                                                                                                                                                                                                                                                                                                                                                                                                                                                                                                                                                                                        |
|--------------------------|----------------------------------------------------------------------------------------------------------------------------------------------------------------------------------------------------------------------------------------------------------------------------------------------------------------------------------------------------------------------------------------------------------------------------------------------------------------------------------------------------------------------------------------------------------------------------------------------------------------------------------------------------------------------------------------------------------------------------------------------------------------------------------------------------------------------------------------------------------------------------------------------------------------------------------------------------------------------------------------|
| Baseline characteristics |                                                                                                                                                                                                                                                                                                                                                                                                                                                                                                                                                                                                                                                                                                                                                                                                                                                                                                                                                                                        |
| Smoking status           | Yoshiki 1 has the Brinkman index that is the number of cigarettes smoked per day multiplied by the number of years of smoking. We dichotomized it based on 0 or >0.                                                                                                                                                                                                                                                                                                                                                                                                                                                                                                                                                                                                                                                                                                                                                                                                                    |
| Home oxygen therapy      | <p>At least one following receipt within 6 months before the index date (procedure code of at-department procedure master for the medical service fee):</p> <p><u>Procedure code</u><br/> 114003710, 114004310, 114004910, 114005010, 114005410, 114005510, 114006110, 114006210, 114006310, 114006810, 114009610, 114011110, 114011210, 114040710, 114040810, 114041210, 114041310, 114041610, 114041710, 114042770, 114043670, 114045470, 114045670, 114053150, 114055550, 114055650, 114055850, 114055950, 114056350, 114061510, 114062510, 114062610</p>                                                                                                                                                                                                                                                                                                                                                                                                                           |
| Systemic steroid         | <p>Oral or parenteral corticosteroid administration with methylprednisolone equivalent dose of <math>\geq 5</math> mg for <math>\geq 2</math> weeks within a month preceding admission.</p> <p><u>Medication code</u><br/> 2456001F1019, 2456001F2015, 2456400D1016, 2456001F1019, 2456001F1019, 2456001F1019, 2454002S1122, 2456001F2015, 2456001F1019, 2454004F2090, 2454002F3020, 2456001F2015, 2456001F1019, 2456003F2030, 2454404A2010, 2456003F2022, 2452400D1106, 2454002F1183, 2454004Q1078, 2456001F3011, 2452002F1030, 2454004F2065, 2454404A4020, 2452400D1050, 2456003F1034, 2454002F2023, 2454004F2081, 2456002B1062, 2456400D1032, 2454405A5021, 2454405H6026, 2454004F2103, 2456001F1019, 2456400D1016, 2456405D2015, 2456001F2015, 2454401A3020, 2456001F3011, 2454002F1035, 2456400D2012, 2454002S1157, 2456001F1019, 2454405A2022, 2454004B1040, 2456400D2039, 2454004Q1051, 2452400D3036, 2454404A1013, 2456400D3019, 2454004F2ZZZ, 2456405D1019, 2452400D4040,</p> |



|  |                                                                                                                                                                                                                                                                                                                                                                                                                                                                                                                                                                                                                                                                                                                                                                                                                                                                                                                                                                                                                                                                                                                                                                                                                                                                                                                                                                                                                                                                                                                                                                                                                                                                                                                                                                                                                                                                                                                                                    |
|--|----------------------------------------------------------------------------------------------------------------------------------------------------------------------------------------------------------------------------------------------------------------------------------------------------------------------------------------------------------------------------------------------------------------------------------------------------------------------------------------------------------------------------------------------------------------------------------------------------------------------------------------------------------------------------------------------------------------------------------------------------------------------------------------------------------------------------------------------------------------------------------------------------------------------------------------------------------------------------------------------------------------------------------------------------------------------------------------------------------------------------------------------------------------------------------------------------------------------------------------------------------------------------------------------------------------------------------------------------------------------------------------------------------------------------------------------------------------------------------------------------------------------------------------------------------------------------------------------------------------------------------------------------------------------------------------------------------------------------------------------------------------------------------------------------------------------------------------------------------------------------------------------------------------------------------------------------|
|  | 2454004B1032, 2456001F1019, 2456001F1019, 2456400D4023, 2454404A3016, 2454002S1149, 2456001F2015, 2456001F1019, 2454405A4041, 2456400D2012, 2454002F1175, 2456001F3011, 2456405D2015, 2452002F1022, 2454405H2020, 2452001F1036, 2456400D3035, 2452402A1087, 2454004B1059, 2454004B1067, 2456400D4082, 2456001F2015, 2454400C4023, 2452402A5015, 2456001F1019, 2456405D3011, 2456400D3019, 2456001F1019, 2456002B1054, 2456001F3011, 2452400D6043, 2454004F2014, 2454003F1030, 2454002S1041, 2456001F1019, 2452402A5104, 2454407A1025, 2454002F1159, 2452402A5074, 2454001F1022, 2454404A4039, 2452001F1028, 2456400D2080, 2456400D3086, 2456402C3020, 2456001F1019, 2454002F1108, 2454402A2029, 2454404A1021, 2454002F1167, 2452400D6086, 2454002S1ZZZ, 2456402C2024, 2456402C1028, 2456003F1026, 2456001F1019, 2456001T1012, 2456001F1019, 2452400D1114, 2452402A5112, 2452400D7040, 2452400D6094, 2456001F1019, 2456400D2098, 2456400D2101, 2452402A2040, 2452400D1084, 2454405H3027, 2456400D1059, 2454404A3067, 2456400D2012, 2456400D2020, 2456400D1024, 2456400D3027, 2456405D1027, 2452400D1092, 2454405H1032, 2456405D2023, 2454404A1064, 2456405D2015, 2454405H5038, 2452400D1076, 2454405A3029, 2454404A1080, 2456400D1067, 2454405H1024, 2456400D2071, 2454405H3035, 2456400D3116, 2454405H4023, 2452400D1041, 2452400D3052, 2452400D6060, 2454405A1034, 2454405A4033, 2454404A2060, 2456400D1083, 2454405A1042, 2454405A3037, 2454404A2087, 2452400D6078, 2454402A3033, 2456400D3094, 2452400D4032, 2456400D3078, 2454408C1020, 2456405D1019, 2454405H5020, 2456400D4074, 2454404A2036, 2456402C2040, 2456402C1044, 2456400D4066, 2452400D4024, 2454402A2037, 2454402A3025, 2456405D3011, 2456400D2110, 2454407A1033, 2454400C1024, 2452402A1095, 2454404A1030, 2456400D3019, 2456400D1040, 2454405A6028, 2456400D3108, 2452400D6035, 2456400D4090, 2452402A5090, 2456400D4040, 2454400C2020, 2454404A3083, 2456400D1016, 2454404A1013 |
|--|----------------------------------------------------------------------------------------------------------------------------------------------------------------------------------------------------------------------------------------------------------------------------------------------------------------------------------------------------------------------------------------------------------------------------------------------------------------------------------------------------------------------------------------------------------------------------------------------------------------------------------------------------------------------------------------------------------------------------------------------------------------------------------------------------------------------------------------------------------------------------------------------------------------------------------------------------------------------------------------------------------------------------------------------------------------------------------------------------------------------------------------------------------------------------------------------------------------------------------------------------------------------------------------------------------------------------------------------------------------------------------------------------------------------------------------------------------------------------------------------------------------------------------------------------------------------------------------------------------------------------------------------------------------------------------------------------------------------------------------------------------------------------------------------------------------------------------------------------------------------------------------------------------------------------------------------------|

|                          |                                                                                                                                                                                                                                                                                                                                                                                                                                                                                                                                                                                                                                                                                                                                                                                                                                                                                                                                                                                                                                                                                                                                                                                                                                                                                                                                                                                                                                                                                                                                                                                                                                                                                                                                                                                                                                                                                                                                                                                                                                    |
|--------------------------|------------------------------------------------------------------------------------------------------------------------------------------------------------------------------------------------------------------------------------------------------------------------------------------------------------------------------------------------------------------------------------------------------------------------------------------------------------------------------------------------------------------------------------------------------------------------------------------------------------------------------------------------------------------------------------------------------------------------------------------------------------------------------------------------------------------------------------------------------------------------------------------------------------------------------------------------------------------------------------------------------------------------------------------------------------------------------------------------------------------------------------------------------------------------------------------------------------------------------------------------------------------------------------------------------------------------------------------------------------------------------------------------------------------------------------------------------------------------------------------------------------------------------------------------------------------------------------------------------------------------------------------------------------------------------------------------------------------------------------------------------------------------------------------------------------------------------------------------------------------------------------------------------------------------------------------------------------------------------------------------------------------------------------|
| Immunosuppressive agents | <p>Any oral or parenteral immunosuppressive agents usage for <math>\geq 2</math> weeks within a month prior to admission.</p> <p><u>Medication code</u></p> <p>3999004M4028, 3999016M1021, 3999016F1030, 3999016F1049, 3999017M1026, 3999002F2027, 3999014M1022, 3999014M2037, 3999004M3021, 3999004M5024, 6399423F1026, 3999004M4109, 3999004M5105, 3999004M4010, 3999004M5016, 4291024M1024, 4291038M2022, 3999016F1073, 6399414A1038, 3999016F1022, 3999016M1056, 3999043F1020, 3999014F2054, 3999005F1016, 3999002F1020, 3999014M2029, 3999016M1ZZZ, 3999014N2024, 3999022F1028, 3999022F2024, 3999014N1028, 3999014N3020, 6399418D1032, 3999005F1016, 3999014M3025, 3999002F4020, 3999444G4021, 4291019M1023, 3999448G2027, 3999448G3023, 3999014M1030, 3999014D1022, 3999004M4117, 3999004M3110, 3999004M3145, 3999042F3028, 3999429G2024, 3999053F2020, 3999042F1025, 3999042F2021, 3999004S1036, 3999002F2035, 3999448G1020, 3999016F1014, 4291019M2020, 4291038M4025, 6399421G1022, 3999016M1080, 3999038F1029, 3999445D2027, 3999445D1020, 3999053F1023, 3999048G2024, 3999004M5091, 3999005F1040, 4291038M3029, 3999029M1029, 3999004M4087, 3999004M5083, 1190402A1028, 1190024M1028, 3999043F2026, 3999004S2032, 3999017M1042, 2399403F1039, 3999034F1020, 3999426G4023, 3999426G6026, 2399405F1020, 3999025F1021, 3999014D2029, 3999004M5113, 3999439G1021, 3999442G2020, 3999016F1ZZZ, 3999004M3102, 6399424A1023, 6399427A1027, 6399427A3020, 3999004M1029, 3999004M2025, 3999020F1029, 3999020F2025, 6399421F1027, 3999004M4095, 3999005F1016, 2399403F1047, 3999017M1ZZZ, 3999014F4049, 3999017M1050, 3999016M1064, 3999014M1ZZZ, 3999014M2ZZZ, 4291038M1026, 3999004M3064, 3999004M5075, 4291024M2020, 6399428G1024, 3999406A1024, 3999014M2061, 3999004M5121, 3999446G1021, 3999002F2ZZZ, 3999029M1037, 3999014F3042, 3999016M1072, 3999048G1028, 3999014M2070, 3999014M1073, 3999014M1065, 3999014F2020, 3999005F1016, 3999444G2029, 3999004S2024, 3999437G1022, 3999441G1029, 4291451A1028, 4291451A2024,</p> |
|--------------------------|------------------------------------------------------------------------------------------------------------------------------------------------------------------------------------------------------------------------------------------------------------------------------------------------------------------------------------------------------------------------------------------------------------------------------------------------------------------------------------------------------------------------------------------------------------------------------------------------------------------------------------------------------------------------------------------------------------------------------------------------------------------------------------------------------------------------------------------------------------------------------------------------------------------------------------------------------------------------------------------------------------------------------------------------------------------------------------------------------------------------------------------------------------------------------------------------------------------------------------------------------------------------------------------------------------------------------------------------------------------------------------------------------------------------------------------------------------------------------------------------------------------------------------------------------------------------------------------------------------------------------------------------------------------------------------------------------------------------------------------------------------------------------------------------------------------------------------------------------------------------------------------------------------------------------------------------------------------------------------------------------------------------------------|

|  |                                                                                                                                                                                                                                                                                                                                                                                                                                                                                                                                                                                                                                                                                                                                                                                                                                                                                                                                                                                                                                                                                                                                                                                                                                                                                                                                                                                                                                                                                                                                                                                                                                                                                                                                                                                                                                                                                                                                                                                                                                                                                                 |
|--|-------------------------------------------------------------------------------------------------------------------------------------------------------------------------------------------------------------------------------------------------------------------------------------------------------------------------------------------------------------------------------------------------------------------------------------------------------------------------------------------------------------------------------------------------------------------------------------------------------------------------------------------------------------------------------------------------------------------------------------------------------------------------------------------------------------------------------------------------------------------------------------------------------------------------------------------------------------------------------------------------------------------------------------------------------------------------------------------------------------------------------------------------------------------------------------------------------------------------------------------------------------------------------------------------------------------------------------------------------------------------------------------------------------------------------------------------------------------------------------------------------------------------------------------------------------------------------------------------------------------------------------------------------------------------------------------------------------------------------------------------------------------------------------------------------------------------------------------------------------------------------------------------------------------------------------------------------------------------------------------------------------------------------------------------------------------------------------------------|
|  | 3999439G2028, 3999014F4022, 3999057F1021, 3999437G2029, 3999434A1026, 3999002F1055, 3999046F2020, 3999017M1034, 3999004M4079, 6399414A1020, 3999451G4021, 3999445G2023, 3999462A1028, 3999002F2051, 3999014M1049, 3999056M1026, 6399418D1024, 3999004M3099, 3999016F1065, 3999004M4141, 3999450G2024, 3999459G3021, 3999014F2038, 3999004M5ZZZ, 3999046F1023, 3999004M4ZZZ, 3999014F1058, 3999014F4ZZZ, 3999014M1057, 3999014F1023, 3999467G1023, 3999468G1028, 6399430A1029, 1190024M2024, 6399413A1025, 3999048G4027, 2399407A1021, 3999450G3020, 3999025F1030, 3999014F3026, 3999016M1013, 3999417D1037, 3999002F1039, 2399404F1033, 4291035F1023, 2399018F1024, 3999002F3023, 4900400X1021, 3999014F1031, 3999417D1029, 3999426G2020, 3999457G3022, 3999448G4020, 3999463G4024, 3999426G7022, 3999016F1057, 3999016M1099, 3999002F1ZZZ, 3999456G1025, 3999014M3033, 3999451G4030, 3999451G2037, 3999439G4020, 2399404F1025, 3999450A1025, 4291019M3026, 3999004M3ZZZ, 6399403D2024, 3999014M2053, 3999051F1024, 3999051F2020, 3999004M3013, 3999017B1025, 3999004M5148, 3999022F3020, 3999004M4125, 3999014F4030, 3999004M3013, 3999434D1022, 6399427A2023, 3999004M3080, 3999014M2045, 3999442G1023, 3999048G3020, 3999450G4027, 3999014F3ZZZ, 3999014F6025, 3999016M1048, 3999463G3028, 3999016M1102, 3999444G3025, 3999014F6033, 6399409A1029, 3999016F1014, 3999014F2046, 3999004M5016, 3999004S1028, 3999424G6027, 3999017M1069, 3999020F3021, 3999451G3033, 3999445G1027, 3999444G1022, 3999004M5059, 3999014F1040, 4291428A1029, 3999424D2025, 3999468G2024, 3999468G3020, 3999468G4027, 2399406F1024, 3999451G2029, 3999002F2043, 3999004M4010, 3999014M3076, 3999025F1ZZZ, 3999439G3024, 6399429A1026, 6399431A1023, 3999004M5040, 3999004M3129, 3999004M3048, 3999004M4052, 3999004M5067, 3999424G1025, 3999424D1029, 3999424G2021, 3999424G3028, 4291407A1027, 4291407A2023, 4291407A1035, 3999406A1032, 2399402F1026, 4291439A1027, 4291439A2023, 4291407A2031, 6399421A2026, 6399421A3022, 3999429D1021, 3999433G1024, 6399421G2029, 3999426G1024, 3999431A1022, 3999433G2020, |
|--|-------------------------------------------------------------------------------------------------------------------------------------------------------------------------------------------------------------------------------------------------------------------------------------------------------------------------------------------------------------------------------------------------------------------------------------------------------------------------------------------------------------------------------------------------------------------------------------------------------------------------------------------------------------------------------------------------------------------------------------------------------------------------------------------------------------------------------------------------------------------------------------------------------------------------------------------------------------------------------------------------------------------------------------------------------------------------------------------------------------------------------------------------------------------------------------------------------------------------------------------------------------------------------------------------------------------------------------------------------------------------------------------------------------------------------------------------------------------------------------------------------------------------------------------------------------------------------------------------------------------------------------------------------------------------------------------------------------------------------------------------------------------------------------------------------------------------------------------------------------------------------------------------------------------------------------------------------------------------------------------------------------------------------------------------------------------------------------------------|

|                                           |                                                                                                                                                                                                                                                                                                                                                                                                                                                                                                                                                                                                                                                                                                                                                                                                                                                                           |
|-------------------------------------------|---------------------------------------------------------------------------------------------------------------------------------------------------------------------------------------------------------------------------------------------------------------------------------------------------------------------------------------------------------------------------------------------------------------------------------------------------------------------------------------------------------------------------------------------------------------------------------------------------------------------------------------------------------------------------------------------------------------------------------------------------------------------------------------------------------------------------------------------------------------------------|
|                                           | 3999429G1028, 3999426G3027, 3999426G5020, 3999416A2024, 3999431G1025, 3999416A1028, 6399421A1020, 3999450G1028, 3999424G4024                                                                                                                                                                                                                                                                                                                                                                                                                                                                                                                                                                                                                                                                                                                                              |
| Dyspnea score (Hugh–Johns classification) | <p>Each item was defined as follows:</p> <p>I: “Is the patient's breath as good as that of other men of his own age and build at work, on walking, and on climbing hills or stairs?”</p> <p>II: “Is the patient able to walk with normal men of own age and build on the level but unable to keep up on hills or stairs?”</p> <p>III: “Is the patient unable to keep up with normal men on the level, but able to walk about a mile or more at his own speed?”</p> <p>IV: “Is the patient unable to walk more than about 100 yards on the level without a rest?”</p> <p>V: “Is the patient breathless on talking or undressing, or unable to leave his house because of breathlessness?”</p>                                                                                                                                                                              |
| Oxygen use on admission                   | <p>Oxygen therapy on admission or the next day.</p> <p>Procedure code: 140005610</p>                                                                                                                                                                                                                                                                                                                                                                                                                                                                                                                                                                                                                                                                                                                                                                                      |
| Mental status                             | <p>In our statistical analysis, we defined the cut-off value as follows:</p> <p>High: 0 &lt; score</p> <p>Low: score = 0</p> <p>0: Normal</p> <p>1-digit code: the patient is awake without any stimuli, and is:</p> <p>1: Almost fully conscious</p> <p>2: Unable to recognize time, place, and person</p> <p>3: Unable to recall name or date of birth</p> <p>2-digit code: The patient can be aroused (then reverts to previous state after cessation of stimulation):</p> <p>10: By easily being spoken to (or is responsive with purposeful movements, phrases, or words)</p> <p>20: With a loud voice or shaking of shoulders (or is almost always responsive to very simple words like yes or no or to movements)</p> <p>30: Only by repeated mechanical stimuli</p> <p>3-digit code: The patient cannot be aroused with any forceful mechanical stimuli, and:</p> |

|                                            |                                                                                                                                                                                                                                                                                                                                                                                                                                                                                                                                                                                                                                                                                                                                                                                                                                                                                                                                                                                                                                                                                                                                                                                                                                                                                                                                                |
|--------------------------------------------|------------------------------------------------------------------------------------------------------------------------------------------------------------------------------------------------------------------------------------------------------------------------------------------------------------------------------------------------------------------------------------------------------------------------------------------------------------------------------------------------------------------------------------------------------------------------------------------------------------------------------------------------------------------------------------------------------------------------------------------------------------------------------------------------------------------------------------------------------------------------------------------------------------------------------------------------------------------------------------------------------------------------------------------------------------------------------------------------------------------------------------------------------------------------------------------------------------------------------------------------------------------------------------------------------------------------------------------------|
|                                            | <p>100: Responds with movements to avoid the stimulus</p> <p>200: Responds with slight movements, including decerebrate and decorticate posture</p> <p>300: Does not respond at all except for changes in respiratory rhythm</p>                                                                                                                                                                                                                                                                                                                                                                                                                                                                                                                                                                                                                                                                                                                                                                                                                                                                                                                                                                                                                                                                                                               |
| Activities of daily living (Barthel index) | <p>The final score is total score * 5 to get a point score out of a 100. In our descriptive analysis, we defined the cut-off value as follows:</p> <p><b>Bowels</b></p> <p>0: Incontinent (or needs to be given enema)</p> <p>1: Occasional accident (once/week)</p> <p>2: Continent</p> <p><b>Bladder</b></p> <p>0: Incontinent, or catheterised and unable to manage</p> <p>1: Occasional accident (max. once per 24 hours)</p> <p>2: Continent (for over 7 days)</p> <p><b>Grooming</b></p> <p>0: Needs help with personal care</p> <p>1: Independent face/hair/teeth/shaving (implements provided)</p> <p><b>Toilet use</b></p> <p>0: Dependent</p> <p>1: Needs some help, but can do something alone</p> <p>2: Independent (on and off, dressing, wiping)</p> <p><b>Feeding</b></p> <p>0: Unable</p> <p>1: Needs help cutting, spreading butter, etc.</p> <p>2: Independent (food provided within reach)</p> <p><b>Transfer</b></p> <p>0: Unable – no sitting balance</p> <p>1: Major help (one or two people, physical), can sit</p> <p>2: Minor help (verbal or physical)</p> <p>3: Independent</p> <p><b>Mobility</b></p> <p>0: Immobile</p> <p>1: Wheelchair independent, including corners, etc.</p> <p>2: Walks with help of one person (verbal or physical)</p> <p>3: Independent (but may use any aid)</p> <p><b>Dressing</b></p> |

|                                        |                                                                                                                                                                                                                                                                                                                                                                                                                                                                                                                                                                                                                                                                                                                                                                                                                                                                                                                                                                                                                                                                                                                                                                                                                                                                                                                                                                                          |
|----------------------------------------|------------------------------------------------------------------------------------------------------------------------------------------------------------------------------------------------------------------------------------------------------------------------------------------------------------------------------------------------------------------------------------------------------------------------------------------------------------------------------------------------------------------------------------------------------------------------------------------------------------------------------------------------------------------------------------------------------------------------------------------------------------------------------------------------------------------------------------------------------------------------------------------------------------------------------------------------------------------------------------------------------------------------------------------------------------------------------------------------------------------------------------------------------------------------------------------------------------------------------------------------------------------------------------------------------------------------------------------------------------------------------------------|
|                                        | 0: Dependent<br>1: Needs help, but can do about half unaided<br>2: Independent (including buttons, zips, laces etc.)<br><b>Stairs</b><br>0: Unable<br>1: Needs help (verbal, physical, carrying aid)<br>2: independent up and down<br><b>Bathing</b><br>0: Dependent<br>1: Independent (or in shower)                                                                                                                                                                                                                                                                                                                                                                                                                                                                                                                                                                                                                                                                                                                                                                                                                                                                                                                                                                                                                                                                                    |
| Exposures                              |                                                                                                                                                                                                                                                                                                                                                                                                                                                                                                                                                                                                                                                                                                                                                                                                                                                                                                                                                                                                                                                                                                                                                                                                                                                                                                                                                                                          |
| Empirical anti-pseudomonal antibiotics | Intravenous anti-pseudomonal antibiotics administered on admission or the next day as the intervention, regardless of the dose.<br><br><u>Medication code</u><br>2634710M1085, 6241010F2027, 6241013F3027, 6241013F3051, 2647709M1102, 6135001F2025, 6241013F1024, 6241018F1027, 1319742Q2027, 6241013F2055, 2647709Q1040, 1319722M1013, 1319742Q1250, 1319722M1013, 6123404A1060, 6241017F1022, 2634710M1034, 6131403D2019, 6241013F3019, 1319749Q1030, 1319742Q1039, 1319742Q2019, 6135001R2110, 2634710M1077, 6241010C1024, 2647709M1137, 2634710M1050, 2647709N1060, 1319742Q2019, 6241013F2020, 1329706Q1039, 2634710N1030, 1329706Q1020, 1319722M1056, 1317708Q1037, 6132418F2110, 2647709M1145, 1319800M1023, 1319742Q1ZZZ, 6241013F2012, 1319801Q1020, 1319742Q1020, 6241008F2020, 6132418F2021, 1319722M1021, 1319727Q1174, 6241013F3019, 6123402A3012, 1319722Q1112, 1319722Q1023, 2647709M1064, 1319727Q1026, 1319722Q1163, 2634710M1093, 2647709M1110, 6241013F2306, 1319742Q1144, 2647709N1078, 6241013C2032, 6139400D1068, 6241013F3ZZZ, 1319742Q2019, 1319751Q1020, 6241006F1121, 6241014F1029, 6241013F1229, 6241013C2024, 1319749Q1022, 1319742Q1152, 2634710M1ZZZ, 6131403D1195, 6241013F1199, 6131403D2191, 6131403D1012, 6241013F2250, 6241013F3256, 1319742Q2132, 6241013F5020, 6241013F2209, 6241013F3205, 2634710M1069, 6241013F1210, 6241015F1023, 1319742Q2019, |

|  |                                                                                                                                                                                                                                                                                                                                                                                                                                                                                                                                                                                                                                                                                                                                                                                                                                                                                                                                                                                                                                                                                                                                                                                                                                                                                                                                                                                                                                                                                                                                                                                                                                                                                                                                                                                                                                                                                                                                                                                                                                                                                                 |
|--|-------------------------------------------------------------------------------------------------------------------------------------------------------------------------------------------------------------------------------------------------------------------------------------------------------------------------------------------------------------------------------------------------------------------------------------------------------------------------------------------------------------------------------------------------------------------------------------------------------------------------------------------------------------------------------------------------------------------------------------------------------------------------------------------------------------------------------------------------------------------------------------------------------------------------------------------------------------------------------------------------------------------------------------------------------------------------------------------------------------------------------------------------------------------------------------------------------------------------------------------------------------------------------------------------------------------------------------------------------------------------------------------------------------------------------------------------------------------------------------------------------------------------------------------------------------------------------------------------------------------------------------------------------------------------------------------------------------------------------------------------------------------------------------------------------------------------------------------------------------------------------------------------------------------------------------------------------------------------------------------------------------------------------------------------------------------------------------------------|
|  | 6135001R1025, 6135400F2058, 1319742Q1233, 6241008F1112, 6132418F2161, 1319742Q2108, 1329706Q1012, 6119400A3037, 6241013C1028, 6241013F3043, 6241005F2018, 1319722Q1210, 2647709M1013, 1319742Q2019, 2634710M1026, 6241005F1011, 6132424F2051, 6241008F2143, 1319742Q2140, 1317708Q1029, 1325703Q1036, 1319802Q2020, 1319751Q1038, 6241008F1023, 6241008F2089, 6241005F1020, 6139400D3028, 6123402A1010, 1319742Q2248, 2647709M1ZZZ, 1319722Q1015, 6123402A3063, 6241013F3019, 2647709Q1015, 6135001F1029, 6241006F1016, 6241013F4023, 1319742Q1217, 6132424F2086, 6135400F3011, 6132418F2030, 6131403D1039, 1319722Q1058, 2634710M1018, 1319742Q2019, 1319722Q1015, 6241008F2011, 1319742Q2019, 1319727Q1158, 6241005F1011, 6241013F2012, 6123402A3012, 6241010C1ZZZ, 2647709Q1031, 6241013F3302, 1319722Q1015, 2634710M1042, 1319742Q1209, 6241008F2ZZZ, 6119400A1085, 6241013F3159, 1319722Q1104, 6241013F3175, 6241008F2011, 6241013F1245, 1319722Q1015, 6134407A3027, 1319722Q2011, 6241005F2026, 6241010C1059, 1319802Q2047, 6241013F1237, 1319722Q1139, 6134407A3019, 6241010F2116, 6241008F2011, 6119400A2090, 6241013F2ZZZ, 6134407A1016, 6241008F2160, 6135400F2201, 6241005F3022, 6241013F3019, 6131403P2015, 1329706Q1012, 6241018F1035, 6131403D1012, 1319802Q2039, 1319742Q2ZZZ, 1319742Q1098, 6241400A1022, 1319734Q1034, 1319742Q1284, 6132418F2048, 6241013F1091, 6119400A2065, 6241013F3019, 2647709N1043, 6123402A3160, 6135400F1116, 6241013F7022, 6241013F3019, 6135001M2130, 6132424F1080, 6119400A2014, 6119400A3029, 6132418F1025, 6241010F2035, 6123402A3225, 6241400A6032, 6132410D2024, 6241013F2152, 2634710N1021, 1319742Q1241, 6241009M1027, 1319722Q1015, 1319742Q2051, 6123402A3080, 6123402A1222, 6241013F3019, 1319815M1020, 1317706Q1097, 6134407A2101, 1319722M1ZZZ, 2634710M1018, 6241013F3264, 2647709N1019, 6135001M2016, 6241010C1032, 1329709Q1032, 6241010F2086, 6241013F2292, 1319742Q1136, 6123404A1116, 6241009M1035, 6241008F1015, 1319742Q1080, 6139400G2036, 6123402D1040, 2647709M1048, 6241018C1020, 6241013S2029, 6132425D2012, 6241008F1ZZZ, |
|--|-------------------------------------------------------------------------------------------------------------------------------------------------------------------------------------------------------------------------------------------------------------------------------------------------------------------------------------------------------------------------------------------------------------------------------------------------------------------------------------------------------------------------------------------------------------------------------------------------------------------------------------------------------------------------------------------------------------------------------------------------------------------------------------------------------------------------------------------------------------------------------------------------------------------------------------------------------------------------------------------------------------------------------------------------------------------------------------------------------------------------------------------------------------------------------------------------------------------------------------------------------------------------------------------------------------------------------------------------------------------------------------------------------------------------------------------------------------------------------------------------------------------------------------------------------------------------------------------------------------------------------------------------------------------------------------------------------------------------------------------------------------------------------------------------------------------------------------------------------------------------------------------------------------------------------------------------------------------------------------------------------------------------------------------------------------------------------------------------|

|  |                                                                                                                                                                                                                                                                                                                                                                                                                                                                                                                                                                                                                                                                                                                                                                                                                                                                                                                                                                                                                                                                                                                                                                                                                                                                                                                                                                                                                                                                                                                                                                                                                                                                                                                                                                                                                                                                                                                                                                                                                                                                                                 |
|--|-------------------------------------------------------------------------------------------------------------------------------------------------------------------------------------------------------------------------------------------------------------------------------------------------------------------------------------------------------------------------------------------------------------------------------------------------------------------------------------------------------------------------------------------------------------------------------------------------------------------------------------------------------------------------------------------------------------------------------------------------------------------------------------------------------------------------------------------------------------------------------------------------------------------------------------------------------------------------------------------------------------------------------------------------------------------------------------------------------------------------------------------------------------------------------------------------------------------------------------------------------------------------------------------------------------------------------------------------------------------------------------------------------------------------------------------------------------------------------------------------------------------------------------------------------------------------------------------------------------------------------------------------------------------------------------------------------------------------------------------------------------------------------------------------------------------------------------------------------------------------------------------------------------------------------------------------------------------------------------------------------------------------------------------------------------------------------------------------|
|  | 1319727Q1115, 6241400A5010, 6241013F3108, 6241013F3230, 6131403D2035, 6132425D1040, 1329706Q1047, 1319722Q1015, 6241013F1270, 6241013F6026, 6123404A2023, 6241013F3086, 6241008F2178, 1319801Q1062, 1319722Q1ZZZ, 1319742Q1063, 6119400A4017, 1319722Q1015, 6123402A3012, 6241018F1ZZZ, 6241400A6040, 1325703Q1028, 6135400G2045, 6139505G2037, 6139505F4069, 6132418F1130, 6119400A4017, 1319742Q2094, 6241009F1028, 6131403D2140, 6241005D1029, 6135400F1027, 1319734Q1042, 6241013F3019, 6241013F2012, 6241010F1020, 6132418F1068, 1319800M1015, 6241005F2310, 6241013F2012, 1319722M1030, 6241008F1015, 6135001R2013, 6139500F2012, 6241013F1083, 6132418F2013, 6241013F2012, 2647709N1ZZZ, 6241013F2012, 1317706Q1100, 6241010F2043, 6131403P1019, 6241013F1261, 1317706Q1020, 6134407A2012, 6241010F2078, 6241013F2080, 1319742Q1047, 6241013F2012, 6119400A4017, 6241013F2233, 6119400A2014, 6134407A2012, 6241008F1040, 6241013F1075, 1319742Q1276, 6241013F2179, 6241013C2ZZZ, 6241013C1052, 6139500F2071, 6131403D2248, 1319722Q1015, 6241008F1015, 6241013F3329, 6241010F1055, 6241400A3076, 2639803X1027, 6241013F1121, 1319727Q1018, 6125400D4029, 2647709Q1023, 6132424F1020, 6129400F1020, 6241013F1180, 1319722Q1015, 6241013F2012, 6241013S1022, 6241402G1105, 1319742Q1195, 6132418F2188, 6241010F2ZZZ, 6241013F3299, 6139400G1056, 6134407A2098, 1319722Q1015, 6139400D1106, 1319742Q1306, 1319734Q2030, 6241006F1016, 1319727Q1018, 1319727Q1190, 1329706Q1ZZZ, 6123402A1010, 6241005F2018, 6241006F1016, 1319734Q1026, 6241006F1016, 1317706Q1119, 6169700G1025, 6135001M2024, 1319742Q2124, 6135400F2147, 6135400F2015, 6135400F2031, 1319722Q1015, 6241010F2124, 6241013F2047, 1319722Q1015, 6241013F1288, 6135400F3097, 6241013F1032, 6123402A1087, 6241013F2012, 6241013F3140, 6119400A2057, 6241010C1040, 6241010C1067, 6123402A1095, 6241013F2012, 6135400F1019, 6119400A1050, 6241013F1130, 2647709Q1ZZZ, 6241013C1095, 1319742Q2019, 6241400A4099, 6241010F2051, 6241013F3094, 1319722Q1015, 1319742Q2019, 6241013F1202, 1319742Q1179, 6123402A1010, 1329709Q1024, |
|--|-------------------------------------------------------------------------------------------------------------------------------------------------------------------------------------------------------------------------------------------------------------------------------------------------------------------------------------------------------------------------------------------------------------------------------------------------------------------------------------------------------------------------------------------------------------------------------------------------------------------------------------------------------------------------------------------------------------------------------------------------------------------------------------------------------------------------------------------------------------------------------------------------------------------------------------------------------------------------------------------------------------------------------------------------------------------------------------------------------------------------------------------------------------------------------------------------------------------------------------------------------------------------------------------------------------------------------------------------------------------------------------------------------------------------------------------------------------------------------------------------------------------------------------------------------------------------------------------------------------------------------------------------------------------------------------------------------------------------------------------------------------------------------------------------------------------------------------------------------------------------------------------------------------------------------------------------------------------------------------------------------------------------------------------------------------------------------------------------|



|  |                                                                                                                                                                                                                                                                                                                                                                                                                                                                                                                                                                                                                                                                                                                                                                                                                                                                                                                                                                                                                                                                                                                                                                                                                                                                                                                                                                                                                                                                                                                                                                                                                                                                                                                                                                                                                                                                                                                                                                                                                                                                                                 |
|--|-------------------------------------------------------------------------------------------------------------------------------------------------------------------------------------------------------------------------------------------------------------------------------------------------------------------------------------------------------------------------------------------------------------------------------------------------------------------------------------------------------------------------------------------------------------------------------------------------------------------------------------------------------------------------------------------------------------------------------------------------------------------------------------------------------------------------------------------------------------------------------------------------------------------------------------------------------------------------------------------------------------------------------------------------------------------------------------------------------------------------------------------------------------------------------------------------------------------------------------------------------------------------------------------------------------------------------------------------------------------------------------------------------------------------------------------------------------------------------------------------------------------------------------------------------------------------------------------------------------------------------------------------------------------------------------------------------------------------------------------------------------------------------------------------------------------------------------------------------------------------------------------------------------------------------------------------------------------------------------------------------------------------------------------------------------------------------------------------|
|  | 6241013F1156, 6241013F3035, 1319722Q1015, 1319722Q1015, 6241010F1098, 6241013F2039, 6241013F3221, 6241010F2019, 6119400A2081, 1319727Q1220, 6241013F1148, 6241013F2322, 6241006F1016, 6131403D1136, 6241008F1139, 6241005F1ZZZ, 1319742Q1055, 6241010F1110, 1319742Q1187, 1319722Q1066, 6241013F3019, 6135400F2155, 6135400F3151, 1319722Q1015, 6241013F2101, 6139505F3054, 6241400A4013, 6241006F1016, 6241005F2301, 1319727Q1140, 6241005F2018, 6241008F1015, 2647709N1051, 6241013F3019, 1319727Q1ZZZ, 6135001M1052, 1319722Q1015, 1319742Q2019, 6119400A3045, 6241013F2012, 6241010F2060, 6241008F2011, 2647709M1013, 6241010F2094, 6241008F1147, 1319722Q2011, 6135001F2ZZZ, 6241005F2018, 1319742Q2116, 6139400G2028, 6241013F1253, 1319727Q1018, 6241008F1015, 6241010F1047, 6241013C1079, 6241008F2011, 6241013F1105, 6241008F2038, 6119400A2030, 6135400F1043, 6241013F3191, 6241013C1060, 1319742Q1268, 6241013F2195, 6123404A1094, 6135400F3119, 1319727Q1069, 6241010F2108, 6123700G1026, 6241013F3060, 1319722Q1180, 1319742Q2060, 6241008F2011, 6241010F1080, 1319742Q1225, 6119400A3010, 6135001M1044, 6241005F1275, 6241010F3023, 6135001F1ZZZ, 6241010F2019, 6241013F1059, 1319742Q1128, 6241008F2011, 6132426G4024, 6241010F1039, 6241013F7014, 6241008F1074, 1317706Q1127, 6241013C1087, 6241013F6018, 6241008F2135, 1317706Q1ZZZ, 6241013F1113, 6241013F3019, 6241013F2144, 1319742Q1160, 1319722Q1120, 6131403D2264, 6119400A1018, 6241005F2018, 6135001R2021, 6241006F1016, 6241006F1075, 6241010F1101, 6241005F1267, 1319742Q1101, 6241013F3183, 6241006F1016, 6119400A1093, 6241013F2098, 1319742Q2035, 6241013F2128, 1319742Q1110, 1319742Q2230, 2647709M1072, 6241013F2187, 6241008F1058, 6132424F1071, 6241005F2018, 6241013F1296, 1319722Q1031, 6241013F2063, 6241013F2012, 1319727Q1018, 6241013F1172, 1317706Q1089, 6241008F2070, 1319722M1013, 1317706Q1011, 6131403P1019, 6139400D2030, 6132425D2039, 6139401D1020, 6139500F2160, 6139400D2110, 6139505G1057, 6139505F3127, 6119400A2073, 6139402D1032, 6139505F4115, 6132418F2129, 6132426F2026, 6139503D2023, |
|--|-------------------------------------------------------------------------------------------------------------------------------------------------------------------------------------------------------------------------------------------------------------------------------------------------------------------------------------------------------------------------------------------------------------------------------------------------------------------------------------------------------------------------------------------------------------------------------------------------------------------------------------------------------------------------------------------------------------------------------------------------------------------------------------------------------------------------------------------------------------------------------------------------------------------------------------------------------------------------------------------------------------------------------------------------------------------------------------------------------------------------------------------------------------------------------------------------------------------------------------------------------------------------------------------------------------------------------------------------------------------------------------------------------------------------------------------------------------------------------------------------------------------------------------------------------------------------------------------------------------------------------------------------------------------------------------------------------------------------------------------------------------------------------------------------------------------------------------------------------------------------------------------------------------------------------------------------------------------------------------------------------------------------------------------------------------------------------------------------|

|  |                                                                                                                                                                                                                                                                                                                                                                                                                                                                                                                                                                                                                                                                                                                                                                                                                                                                                                                                                                                                                                                                                                                                                                                                                                                                                                                                                                                                                                                                                                                                                                                                                                                                                                                                                                                                                                                                                                                                                                                                                                                                                                 |
|--|-------------------------------------------------------------------------------------------------------------------------------------------------------------------------------------------------------------------------------------------------------------------------------------------------------------------------------------------------------------------------------------------------------------------------------------------------------------------------------------------------------------------------------------------------------------------------------------------------------------------------------------------------------------------------------------------------------------------------------------------------------------------------------------------------------------------------------------------------------------------------------------------------------------------------------------------------------------------------------------------------------------------------------------------------------------------------------------------------------------------------------------------------------------------------------------------------------------------------------------------------------------------------------------------------------------------------------------------------------------------------------------------------------------------------------------------------------------------------------------------------------------------------------------------------------------------------------------------------------------------------------------------------------------------------------------------------------------------------------------------------------------------------------------------------------------------------------------------------------------------------------------------------------------------------------------------------------------------------------------------------------------------------------------------------------------------------------------------------|
|  | 6139400D2021, 6139505F4026, 6131403D2159, 6139400D2129, 6139500G1070, 6139505F4123, 6139500G1054, 6139500G1020, 6135400F2163, 6135400F2198, 6139400D2064, 6139505F4050, 6132425D2020, 6139505G1049, 6139500F2128, 6139400G1064, 6139500F2179, 6139500G1089, 6132426G3028, 6131403P2023, 6139505F4107, 6123402A3110, 6132418F2064, 6123402D1059, 6241402G1024, 6139402D2020, 6241400A5028, 6132424F2027, 6131403D1047, 6123402A1125, 6123402A3128, 6241400A5052, 6123402A3012, 6131403D2230, 6139500F2063, 6139500F2136, 6241400A3025, 6132418F2153, 6131403D2221, 6135400G4021, 6123402D2039, 6139500F2110, 6139400G1030, 6132425D2047, 6131403D1152, 6241400A3041, 6139401G1026, 6123401A2038, 6139500F2098, 6135400F3178, 6241401G2026, 6119400A2014, 6139505F3020, 6241402G1032, 6132418F2056, 6123404A2031, 6134407A2047, 6131403D2043, 6134407A1024, 6135400F3054, 6139500F2020, 6241402A1030, 6139400G1048, 6139400D2056, 6139400D2102, 6139505G1022, 6241400A2029, 6119400A2022, 6134407A3043, 6241401G2042, 6123402A3187, 6135400F1051, 6132424F2078, 6134407A2071, 6139505G1030, 6123404A1086, 6132425G1020, 6139400G1021, 6123404A1108, 6134407A3078, 6132418F2145, 6241400A6024, 6131403D2213, 6139400D1114, 6122400D1028, 6139505F2023, 6139500F2055, 6139400D1033, 6139400D3036, 6139505F3100, 6122400D2024, 6131403D1144, 6123404A1027, 6139503D1027, 6132424F2043, 6135400G1022, 6131403D1217, 6139500F1024, 6132425D1032, 6123402D1067, 6134407A2080, 6139400D1025, 6132410D2032, 6123402A3012, 6123404A2082, 6132418F2137, 6131403D2167, 6123404A1078, 6139500F2144, 6134407A3094, 6131403G1027, 6135400F3208, 6241400A3050, 6123402A1010, 6131403D1225, 6131403D1209, 6135400F1078, 6123402A3047, 6131403P2015, 6139400D2080, 6139505F4093, 6131403P1027, 6123401A3026, 6241401G2034, 6123402A1010, 6123402A1184, 6241401G1046, 6131403D2205, 6241402A1021, 6123402A1044, 6131403D1160, 6139505F1027, 6132424F1047, 6132426F1020, 6139500G1046, 6241402G1091, 6131403D1233, 6241400A3092, 6135400F2228, 6135400F3089, 6131403D1179, 6139402D1024, 6139500F1040, 6123402A1010, |
|--|-------------------------------------------------------------------------------------------------------------------------------------------------------------------------------------------------------------------------------------------------------------------------------------------------------------------------------------------------------------------------------------------------------------------------------------------------------------------------------------------------------------------------------------------------------------------------------------------------------------------------------------------------------------------------------------------------------------------------------------------------------------------------------------------------------------------------------------------------------------------------------------------------------------------------------------------------------------------------------------------------------------------------------------------------------------------------------------------------------------------------------------------------------------------------------------------------------------------------------------------------------------------------------------------------------------------------------------------------------------------------------------------------------------------------------------------------------------------------------------------------------------------------------------------------------------------------------------------------------------------------------------------------------------------------------------------------------------------------------------------------------------------------------------------------------------------------------------------------------------------------------------------------------------------------------------------------------------------------------------------------------------------------------------------------------------------------------------------------|

|  |                                                                                                                                                                                                                                                                                                                                                                                                                                                                                                                                                                                                                                                                                  |
|--|----------------------------------------------------------------------------------------------------------------------------------------------------------------------------------------------------------------------------------------------------------------------------------------------------------------------------------------------------------------------------------------------------------------------------------------------------------------------------------------------------------------------------------------------------------------------------------------------------------------------------------------------------------------------------------|
|  | 6139505F3119, 6241400A5036, 6139400D2048, 6123402D2055, 6241402G1083, 6135400F3160, 6241401G3022, 6132418F1041, 6119400A4033, 6123402A1117, 6132418F2099, 6241400A3068, 6119400A1069, 6119400A4025, 6132418F2170, 6139402G1039, 6241400A4021, 6123402D2063, 6123404A1035, 6119400A1026, 6132418F1084, 6132425D1024, 6139400D1122, 6123402A3209, 6139505G2045, 6131403D1241, 6123404A2074, 6123404A2058, 6139400D2099, 6134407A1040, 6139402G1020, 6241401G1020, 6135400G3025, 6123401A1031, 6135400F3224, 6119400A4041, 6135400F3232, 6134407A3019, 6123402D1032, 6139500F1121, 6132418F1092, 6135400F2210, 6123404A2090, 6135400F3216, 6241401G1038, 6131403D2019, 6139505F4085 |
|--|----------------------------------------------------------------------------------------------------------------------------------------------------------------------------------------------------------------------------------------------------------------------------------------------------------------------------------------------------------------------------------------------------------------------------------------------------------------------------------------------------------------------------------------------------------------------------------------------------------------------------------------------------------------------------------|

**Supplementary Table S3.** Patient characteristics stratified by the presence of bacterial culture results

|                               | Absence of bacterial culture<br>results | Presence of bacterial culture<br>results |
|-------------------------------|-----------------------------------------|------------------------------------------|
|                               | (N* = 684)                              | (N = 171)                                |
| Age (mean (SD <sup>b</sup> )) | 74.9 (12.4)                             | 76.6 (11.5)                              |
| Male                          | 543 (79.4)                              | 137 (80.1)                               |
| Number of beds (%)            |                                         |                                          |
| ≥100–<300                     | 87 (12.7)                               | 0.0 (0.0)                                |
| ≥300–<500                     | 341 (49.9)                              | 19 (11.1)                                |
| ≥500                          | 256 (37.4)                              | 152 (88.9)                               |
| Source of infection (%)       |                                         |                                          |
| Community-acquired            | 531 (77.6)                              | 145 (84.8)                               |
| Nursing-care-acquired         | 60 (8.8)                                | 11 (6.4)                                 |
| Hospital-acquired             | 93 (13.6)                               | 15 (8.8)                                 |
| Body mass index (%)           |                                         |                                          |
| <18.5 kg/m <sup>2</sup>       | 162 (23.7)                              | 26 (15.2)                                |
| ≥18.5–<25 kg/m <sup>2</sup>   | 325 (47.5)                              | 68 (39.8)                                |
| ≥25 kg/m <sup>2</sup>         | 119 (17.4)                              | 14 (8.2)                                 |
| Missing                       | 78 (11.4)                               | 63 (36.8)                                |
| Activity of daily living (%)  |                                         |                                          |
| Full support                  | 184 (26.9)                              | 27 (15.8)                                |
| Partially dependent           | 74 (10.8)                               | 38 (22.2)                                |
| Independent                   | 426 (62.3)                              | 106 (62.0)                               |
| Altered mental status (%)     | 149 (21.8)                              | 49 (28.7)                                |
| Missing                       | 5 (0.7)                                 | 3 (1.8)                                  |
| Exercise tolerability (%)     |                                         |                                          |
| Low                           | 230 (33.6)                              | 73 (42.7)                                |
| Missing                       | 5 (0.7)                                 | 1 (0.6)                                  |
| Immunodeficiency (%)          | 178 (26.0)                              | 33 (19.3)                                |
| Home oxygen therapy (%)       | 9 (1.3)                                 | 3 (1.8)                                  |

|                                                          |                |                |
|----------------------------------------------------------|----------------|----------------|
| Smoking (%)                                              | 387 (56.6)     | 114 (66.7)     |
| Charlson Comorbidity Score (median [IQR <sup>c</sup> ])  | 4.0 [3.0, 6.0] | 4.0 [3.0, 5.0] |
| Previous antibiotics use within 90 days before admission | 119 (17.4)     | 29 (17.0)      |
| Dialysis at baseline (%)                                 | 4 (0.6)        | 1 (0.6)        |
| Blood urea nitrogen (%)                                  |                |                |
| <14 mg/dL                                                | 269 (39.3)     | 38 (22.2)      |
| ≥14–<22.4 mg/dL                                          | 222 (32.5)     | 75 (43.9)      |
| ≤22.4 mg/dL                                              | 185 (27.0)     | 58 (33.9)      |
| Missing                                                  | 8 (1.2)        | 0.0 (0.0)      |
| Serum albumin (%)                                        |                |                |
| ≤2.7 g/dL                                                | 109 (15.9)     | 9 (5.3)        |
| Missing                                                  | 45 (6.6)       | 2 (1.2)        |
| Oxygen use on admission (%)                              | 421 (61.5)     | 109 (63.7)     |

Abbreviations: \*: N = number

**Supplementary Figure S1.** Balance check after the assignment of propensity score weight

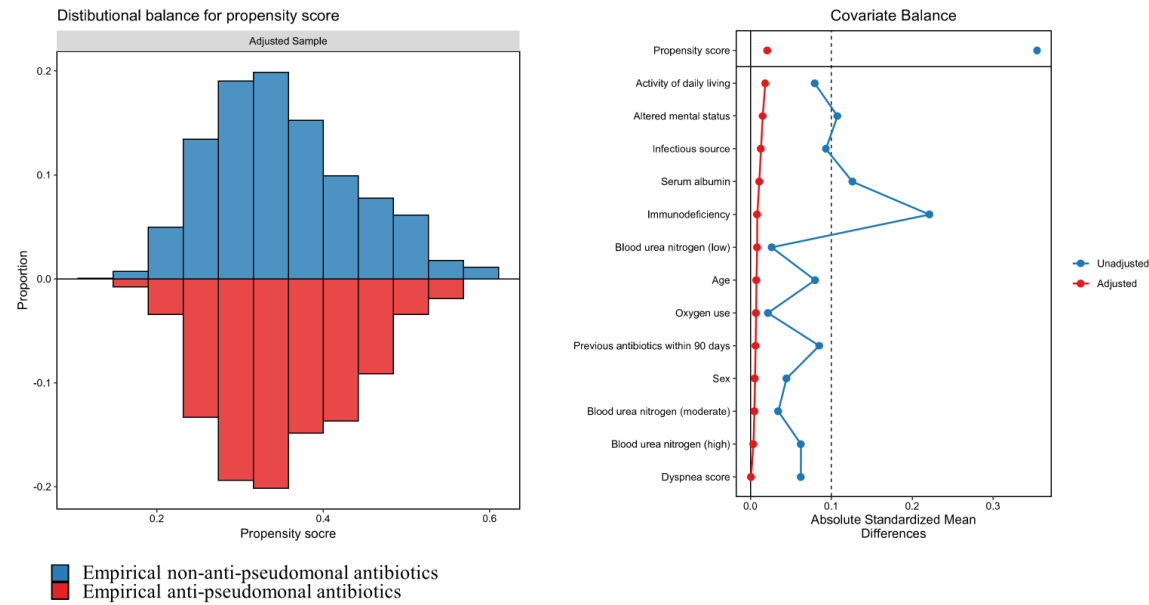

Supplementary Figure S1. This figure visualizes the distributions of the propensity scores and covariates before and after the assignment of propensity score weight. We confirmed the well-balanced distribution.

**Supplementary Figure S2. Bias analysis results**

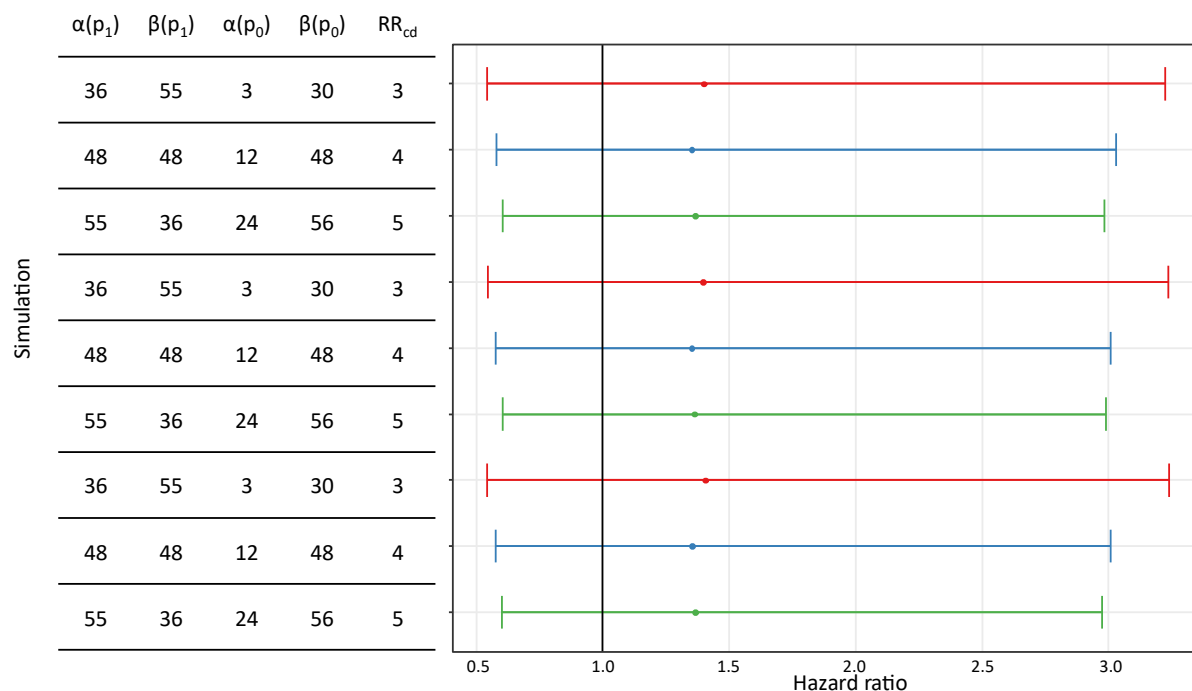

Supplementary Figure S2. This figure summarizes the results of bias analyses. We performed probabilistic bias analyses for a binary unmeasured confounder based on different pairs of parameters: prevalence of among the empirical anti-pseudomonal antibiotics group ( $p_1 = \{0.4, 0.5, 0.6\}$ ) and that among the empirical non-anti-pseudomonal antibiotics group ( $p_0 = \{0.1, 0.2, 0.3\}$ ), and risk ratio of  $C$  and death at 90 days, that is  $RR_{cd} = \{3.0, 4.0, 5.0\}$ . We found the 95% confidence intervals cross the non-significant threshold of 1.
